# Supplementary material for: 4-Hydroxy-N-[3,5-bis(trifluoromethyl)phenyl]-1,2,5-thiadiazole-3-carboxamide: a novel inhibitor of the canonical NF-κB cascade
Source: Royal Society of Chemistry journal article supplement (doi:10.1039/c7md00278e), 2017-01-01
Supplement: c7md00278e1.pdf [file c7md00278e1.pdf]

## Supplementary material

### *4-Hydroxy-N-[3,5-bis(trifluoromethyl)phenyl]-1,2,5-thiadiazole-3-carboxamide: a novel inhibitor of the canonical NF- $\kappa$ B cascade.*

*Agnese C. Pippione,<sup>1</sup> Antonella Federico,<sup>1</sup> Alex Ducime,<sup>1</sup> Stefano Sainas,<sup>1</sup> Donatella Boschi,<sup>1</sup> Alessandro Barge,<sup>1</sup> Elisa Lupino,<sup>2</sup> Marco Piccinini,<sup>2</sup> Michael Kubbutat,<sup>3</sup> Jean-Marie Contreras,<sup>4</sup> Christophe Morice,<sup>4</sup> Salam Al-Karadaghi<sup>5</sup> and Marco L. Lolli.<sup>1\*</sup>*

<sup>1)</sup> Department of Science and Drug Technology, University of Torino, via Pietro Giuria 9, 10125 Torino (Italy). <sup>2)</sup> Department of Oncology, University of Torino, via Michelangelo 27/B, 10125 Torino (Italy). <sup>3)</sup> ProQinase GmbH, Breisacher Str. 117, 79106 Freiburg, Germany. <sup>4)</sup> Prestwick Chemical, 220 Boulevard Gonthier d'Andernach 67400 Illkirch (France). <sup>5)</sup> SARomics Biostructures, Lund (Sweden).

### Table of contents

|                                               |                |
|-----------------------------------------------|----------------|
| <b>Additional biochemical data</b>            | <b>pag. 2</b>  |
| <b>Chemistry</b>                              | <b>pag. 3</b>  |
| <b>NMR characterization of compounds 1-11</b> | <b>pag. 6</b>  |
| <b>Biochemical protocols</b>                  | <b>pag. 17</b> |

## Additional biochemical data.

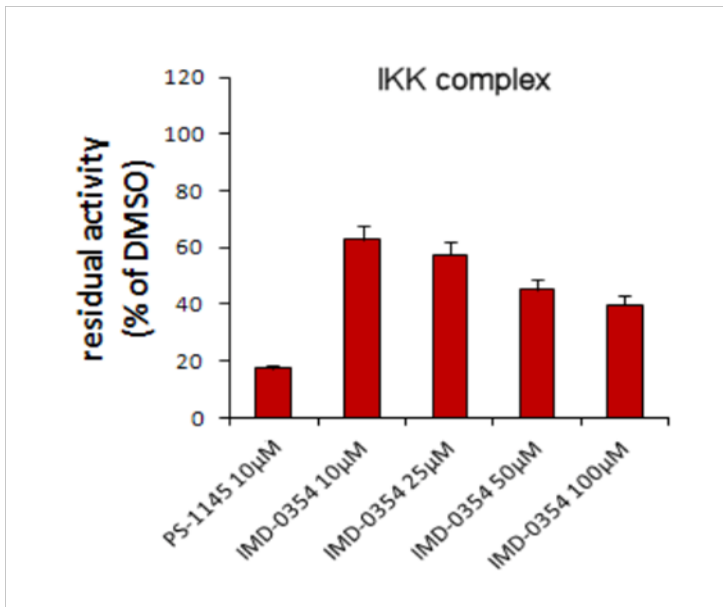

**Figure S1.** Effects of IMD-0354 on IKK complex activity. IKK complex was immunoprecipitated from Jurkat cells treated with 15ng/ml *hTNF* $\alpha$  using an antibody against IKK $\gamma$ . The activity of the complex in the presence of IMD-0354 at increasing concentrations was measured using kinase assay. Values are means  $\pm$  SD of three independent experiments.

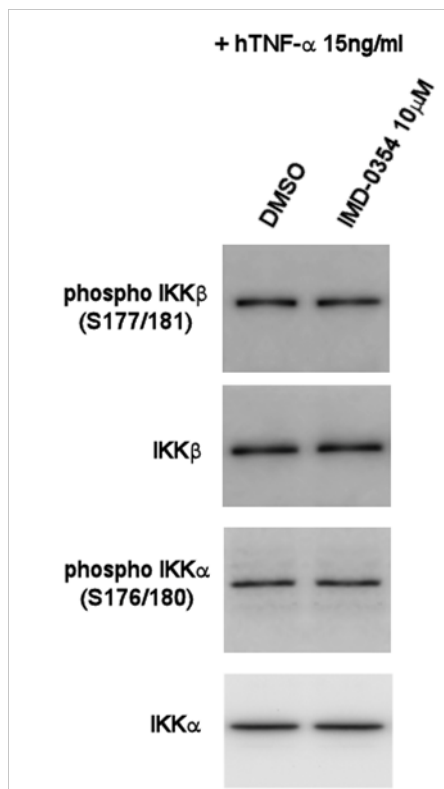

**Figure S2.** Effects of IMD-0354 on phosphorylation of IKKs. Jurkat cells were exposed to 10  $\mu$ M IMD-0354 for 60 min and then treated for 20 minutes with TNF $\alpha$  (15ng/mL). Protein expression and phosphorylation of IKK $\alpha$  and IKK $\beta$  was evaluated by immunoblot analysis as described in biochemical protocols section (see I $\kappa$ B $\alpha$  degradation assay). Values are means  $\pm$  SD of three independent experiments.

## Chemistry.

**General methods.** Final compounds **1** – **11** were assayed in biological experiments. Their purity was measured by HPLC analyses, showing a chromatogram where the main peak (area at least 95% of all detected peaks) was attributable to the final compound. HPLC analyses was performed on a Waters HPLC system composed by: Waters 1525EF binary pump, Waters 717 plus autosampler and Waters 2996 PDA detector. The analytical column was Waters XTerra Phenyl (4.6 x 150 mm, 5 $\mu$ m particle size) column, flow 1 ml/min; compounds were dissolved in CH<sub>3</sub>CN or MeOH. The mobile phase consisted of MeOH (or CH<sub>3</sub>CN)/water with 0.1% trifluoroacetic acid; two gradient profiles of mobile phase were used to assay the purity of each compound. Melting points (m.p.) were measured on a capillary apparatus (Büchi 540). The final m.p. determination was achieved by placing the sample at a temperature 10° C below the m.p. and applying a heating rate of 2 °C min<sup>-1</sup>. All compounds were routinely checked by <sup>1</sup>H- and <sup>13</sup>C-NMR and mass spectrometry. <sup>1</sup>H- and <sup>13</sup>C-NMR spectra were performed on a Bruker Avance 300 instrument or Jeol Resonance ECZ600R. For coupling patterns, the following abbreviations are used: br = broad, s = singlet, d = doublet, dd = doublet of doublets, t = triplet, q = quartet, m = multiplet. HRMS spectra were recorded on an LTQ Orbitrap mass spectrometer (Thermo Scientific, Bremen, Germany) equipped with an atmospheric pressure interface and an ESI ion source instrument.

**4-Hydroxy-N-[3,5-bis(trifluoromethyl)phenyl]-1,2,5-oxadiazole-3-carboxamide (1).** White solid (m.p. 153.7 – 155.2 °C from diisopropyl ether/hexane). <sup>1</sup>H-NMR (300 MHz, (CD<sub>3</sub>)<sub>2</sub>CO):  $\delta$  7.87 (1H, s, *aromatic protons*), 8.54 (2H, s, *aromatic protons*), 10.47 (1H, s, -CONH-), 11.25 (1H, very br s, -OH); <sup>13</sup>C-NMR (75 MHz (CD<sub>3</sub>)<sub>2</sub>CO):  $\delta$  118.2 (q, <sup>3</sup>J<sub>CF</sub> = 3.8 Hz), 120.8 (q, <sup>3</sup>J<sub>CF</sub> = 4.1 Hz), 123.7 (q, <sup>1</sup>J<sub>CF</sub> = 272.0 Hz), 132.4 (q, <sup>2</sup>J<sub>CF</sub> = 33.8 Hz), 139.9, 141.5, 156.4, 163.04. ESI-HRMS (m/z) [M - H]<sup>-</sup> calcd. for C<sub>11</sub>H<sub>4</sub>F<sub>6</sub>N<sub>3</sub>O<sub>3</sub> 340.0151, obsd. 340.0153.

**4-Hydroxy-N-[3-(trifluoromethyl)phenyl]-1,2,5-oxadiazole-3-carboxamide (2).** White solid (m.p. 165.3 – 167.5 °C from diisopropyl ether). <sup>1</sup>H-NMR (300 MHz, (CD<sub>3</sub>)<sub>2</sub>CO):  $\delta$  7.56 (1H, d, J = 7.8 Hz, *aromatic protons*), 7.69 (1H, t, J = 8.0 Hz, *aromatic protons*), 8.08 (1H, d, J = 8.1 Hz, *aromatic protons*), 8.30 (1H, s, *aromatic protons*), 10.24 (1H, s, -CONH-), 11.21 (1H, very br s, -OH); <sup>13</sup>C-NMR (75 MHz (CD<sub>3</sub>)<sub>2</sub>CO):  $\delta$  117.2 (q, <sup>3</sup>J<sub>CF</sub> = 3.9 Hz), 121.7 (q, <sup>3</sup>J<sub>CF</sub> = 3.8 Hz), 124.3, 124.6 (q, <sup>1</sup>J<sub>CF</sub> = 272.1 Hz), 130.4, 131.0 (q, <sup>2</sup>J<sub>CF</sub> = 32.1 Hz), 138.7, 141.7, 156.2, 163.1. ESI-HRMS (m/z) [M - H]<sup>-</sup> calcd. for C<sub>10</sub>H<sub>5</sub>F<sub>3</sub>N<sub>3</sub>O<sub>3</sub> 272.0278, obsd. 272.0274.

**4-Amino-N-[3,5-bis(trifluoromethyl)phenyl]-1,2,5-oxadiazole-3-carboxamide (3).** White solid (m.p. 166.9 – 168.1 °C). <sup>1</sup>H-NMR (300 MHz, (CD<sub>3</sub>)<sub>2</sub>CO):  $\delta$  6.16 (2H, br s, NH<sub>2</sub>), 7.88 (1H, s, *aromatic proton*), 8.59 (2H, s, *aromatic protons*), 10.52 (1H, s, -CONH-); <sup>13</sup>C-NMR (75 MHz (CD<sub>3</sub>)<sub>2</sub>CO):  $\delta$  118.6 (q, <sup>3</sup>J<sub>CF</sub> = 3.8 Hz), 121.4 (q, <sup>3</sup>J<sub>CF</sub> = 4.1 Hz), 124.3 (q, <sup>1</sup>J<sub>CF</sub> = 272.0 Hz), 132.6 (q, <sup>2</sup>J<sub>CF</sub> = 34.0 Hz), 140.6, 141.0, 157.4, 158.8. ESI-HRMS (m/z) [M - H]<sup>-</sup> calcd. for C<sub>11</sub>H<sub>5</sub>F<sub>6</sub>N<sub>4</sub>O<sub>2</sub> 339.0311, obsd. 339.0312.

**4-Hydroxy-N-[3,5-bis(trifluoromethyl)phenyl]-1,2,5-thiadiazole-3-carboxamide (4).** White solid (m.p. 208.0 – 209.6 °C from hexane). <sup>1</sup>H-NMR (300 MHz, CD<sub>3</sub>OD):  $\delta$  7.73 (1H, s, *aromatic proton*), 8.45 (2H, s, *aromatic protons*); <sup>13</sup>C-NMR (75 MHz CD<sub>3</sub>OD):  $\delta$  118.5 (q, <sup>3</sup>J<sub>CF</sub> = 3.8 Hz), 121.4 (q, <sup>3</sup>J<sub>CF</sub> = 4.1 Hz), 124.7 (q, <sup>1</sup>J<sub>CF</sub> = 271.6 Hz), 133.3 (q, <sup>2</sup>J<sub>CF</sub> = 33.4 Hz), 140.5, 141.1, 160.7, 166.0. ESI-HRMS (m/z) [M - H]<sup>-</sup> calcd. for C<sub>11</sub>H<sub>4</sub>F<sub>6</sub>N<sub>3</sub>O<sub>2</sub>S 355.9923, obsd. 355.9921.

**4-Hydroxy-N-[3-(trifluoromethyl)phenyl]-1,2,5-thiadiazole-3-carboxamide (5).** White solid (m.p. 177.6 – 178.9 °C). <sup>1</sup>H-NMR (300 MHz, CD<sub>3</sub>OD): δ 7.45 (1H, d, J = 7.9 Hz *aromatic protons*), 7.55 (1H, t, J = 8.0 Hz, *aromatic protons*), 7.97 (1H, d, J = 8.2 Hz, *aromatic protons*), 8.20 (1H, s, *aromatic protons*); <sup>13</sup>C-NMR (75 MHz CD<sub>3</sub>OD) δ 118.3 (q, <sup>3</sup>J<sub>CF</sub> = 4.0 Hz), 122.3 (q, <sup>3</sup>J<sub>CF</sub> = 4.0 Hz), 125.1, 125.5 (q, <sup>1</sup>J<sub>CF</sub> = 272.5 Hz), 130.8, 132.2 (q, <sup>2</sup>J<sub>CF</sub> = 32.3 Hz), 139.7, 140.8, 160.7, 166.0. ESI-HRMS (m/z) [M - H]<sup>-</sup> calcd. for C<sub>10</sub>H<sub>5</sub>F<sub>3</sub>N<sub>3</sub>O<sub>2</sub>S 288.0049, obsd. 288.0047.

**4-Methoxy-N-[3,5-bis(trifluoromethyl)phenyl]-1,2,5-thiadiazole-3-carboxamide (6).** Pale yellow solid (m.p. 113.0 – 114.4 °C from diisopropyl ether). <sup>1</sup>H-NMR (300 MHz, CD<sub>3</sub>OD): δ 4.18 (3H, s, -OCH<sub>3</sub>), 4.90 (1H, s, -CONH-), 7.71 (1H, s, *aromatic proton*), 8.42 (2H, s, *aromatic protons*); <sup>13</sup>C-NMR (75 MHz CD<sub>3</sub>OD) δ 58.8, 118.4 (q, <sup>3</sup>J<sub>CF</sub> = 3.8 Hz), 121.28 (q, <sup>3</sup>J<sub>CF</sub> = 3.0 Hz), 124.69 (q, <sup>1</sup>J<sub>CF</sub> = 271.8 Hz), 133.29 (q, <sup>2</sup>J<sub>CF</sub> = 33.4 Hz), 141.4, 142.2, 159.5, 166.5. ESI-HRMS (m/z) [M - H]<sup>-</sup> calcd. for C<sub>12</sub>H<sub>6</sub>F<sub>6</sub>N<sub>3</sub>O<sub>2</sub>S 370.0079, obsd. 370.0083.

**5-Hydroxy-N-[3,5-bis(trifluoromethyl)phenyl]-2-methyl-2H-1,2,3-triazole-4-carboxamide (7).** White solid (m.p. 244.5 – 245.2 °C). <sup>1</sup>H NMR (300 MHz, CD<sub>3</sub>OD): δ 4.09 (3H, s, -NCH<sub>3</sub>), 7.67 (1H, s, *aromatic proton*), 8.41 (2H, s, *aromatic protons*); <sup>13</sup>C NMR (75 MHz CD<sub>3</sub>OD): δ 42.7, 117.7 (q, <sup>3</sup>J<sub>CF</sub> = 3.8 Hz), 121.0 (q, <sup>3</sup>J<sub>CF</sub> = 3.8 Hz), 124.7 (q, <sup>1</sup>J<sub>CF</sub> = 271.4 Hz), 125.6, 133.1 (q, <sup>2</sup>J<sub>CF</sub> = 33.2 Hz), 141.7, 160.9, 161.5. ESI-HRMS (m/z) [M - H]<sup>-</sup> calcd. for C<sub>12</sub>H<sub>7</sub>F<sub>6</sub>N<sub>4</sub>O<sub>2</sub> 353.0468, obsd. 353.0469.

**4-Hydroxy-N-[3,5-bis(trifluoromethyl)phenyl]-1-methyl-1H-1,2,3-triazole-5-carboxamide (8).** White solid (m.p. 240.0 – 242.6 °C). <sup>1</sup>H NMR (300 MHz, (CD<sub>3</sub>)<sub>2</sub>CO): δ 4.28 (3H, s, -NCH<sub>3</sub>), 7.75 (1H, s, *aromatic proton*), 8.44 (2H, s, *aromatic protons*) 10.05 (1H, s, -CONH-); <sup>13</sup>C NMR (75 MHz, (CD<sub>3</sub>)<sub>2</sub>CO): δ 39.48, 112.1, 117.3 (q, <sup>3</sup>J<sub>CF</sub> = 3.8 Hz), 120.5 (q, <sup>3</sup>J<sub>CF</sub> = 3.8 Hz), 124.3 (q, <sup>1</sup>J<sub>CF</sub> = 273.4 Hz), 132.4 (q, <sup>2</sup>J<sub>CF</sub> = 33.1 Hz), 141.3, 157.9, 159.8. ESI-HRMS (m/z) [M - H]<sup>-</sup> calcd. for C<sub>12</sub>H<sub>7</sub>F<sub>6</sub>N<sub>4</sub>O<sub>2</sub> 353.0468, obsd. 353.0470.

**5-hydroxy-N-[3,5-bis(trifluoromethyl)phenyl]-2H-1,2,3-triazole-4-carboxamide (9).** White solid (m.p. 163.7 – 164.9 °C). <sup>1</sup>H NMR (600 MHz, (CD<sub>3</sub>)<sub>2</sub>SO): δ 7.77 (1H, s, *aromatic proton*), 8.57 (2H, s, *aromatic proton*), 10.71 (1H, s, -CONH-/OH), 10.89 (0.22H, br s, -CONH-/OH minor tautomer) and 11.08 (0.77H, s, -CONH-/OH major tautomer), 14.67 (0.76H, s, triazole NH major tautomer) and 15.03 (0.23H, br s, triazole NH minor tautomer). <sup>13</sup>C NMR (75 MHz (CD<sub>3</sub>)<sub>2</sub>CO): 110.6, 117.3, 120.5, 124.08 (q, <sup>1</sup>J<sub>CF</sub> = 272.0 Hz), 132.24 (q, <sup>2</sup>J<sub>CF</sub> = 33.2 Hz), 141.0, 160.1, 161.0. ESI-HRMS (m/z) [M - H]<sup>-</sup> calcd. for C<sub>11</sub>H<sub>5</sub>F<sub>6</sub>N<sub>4</sub>O<sub>2</sub> 339.0311, obsd. 339.0313.

**3-Hydroxy-N-[3,5-bis(trifluoromethyl)phenyl]-1-methyl-1H-pyrazole-4-carboxamide (10).** White solid (m.p. 308.2 – 310.6 °C, from diisopropyl ether/hexane). <sup>1</sup>H NMR (300 MHz, (CD<sub>3</sub>)<sub>2</sub>SO): δ 3.70 (3H, s, -NCH<sub>3</sub>), 7.72 (1H, s, *aromatic proton*), 8.07 (1H, s, *aromatic proton*), 8.39 (2H, s, *aromatic protons*), 9.81 (1H, s, -CONH-), 11.24 (1H, br s, -OH); <sup>13</sup>C NMR (75 MHz (CD<sub>3</sub>)<sub>2</sub>SO): δ 38.8, 100.4, 115.8 (q, <sup>3</sup>J<sub>CF</sub> = 3.7 Hz), 119.5 (q, <sup>3</sup>J<sub>CF</sub> = 3.8 Hz), 123.3 (q, <sup>1</sup>J<sub>CF</sub> = 273.5 Hz), 130.6 (q, <sup>2</sup>J<sub>CF</sub> = 32.7 Hz), 133.9, 140.8, 159.8, 161.5. ESI-HRMS (m/z) [M - H]<sup>-</sup> calcd. for C<sub>13</sub>H<sub>8</sub>F<sub>6</sub>N<sub>3</sub>O<sub>2</sub> 352.0515, obsd. 352.0523.

**3-Hydroxy-N-[3,5-bis(trifluoromethyl)phenyl]-1,5-dimethyl-1H-pyrazole-4-carboxamide (11).** White solid (m.p. 302.2 – 303.3 °C, from diisopropyl ether/hexane). <sup>1</sup>H NMR (300

MHz, (CD<sub>3</sub>)<sub>2</sub>SO):  $\delta$  2.47 (3H, s, pyrazol ring -CH<sub>3</sub>), 3.57 (3H, s, -NCH<sub>3</sub>), 7.70 (1H, s, *aromatic protons*), 8.36 (2H, s, *aromatic protons*), 9.88 (1H, s, -CONH-), 11.94 (1H, br s, -OH). <sup>13</sup>C NMR (75 MHz (CD<sub>3</sub>)<sub>2</sub>SO):  $\delta$  10.6, 35.0, 97.4, 115.5 (q, <sup>3</sup>J<sub>CF</sub> = 3.8 Hz), 119.3 (q, <sup>3</sup>J<sub>CF</sub> = 3.8 Hz), 123.9 (q, <sup>1</sup>J<sub>CF</sub> = 270.5 Hz), 131.2 (q, <sup>2</sup>J<sub>CF</sub> = 33.6 Hz), 140.9, 144.6, 159.0, 162.2. ESI-HRMS (m/z) [M - H]<sup>-</sup> calcd. for C<sub>14</sub>H<sub>10</sub>F<sub>6</sub>N<sub>3</sub>O<sub>2</sub> 366.0675, obsd. 366.0678.

4-Hydroxy-N-[3,5-bis(trifluoromethyl)phenyl]-1,2,5-oxadiazole-3-carboxamide (1).

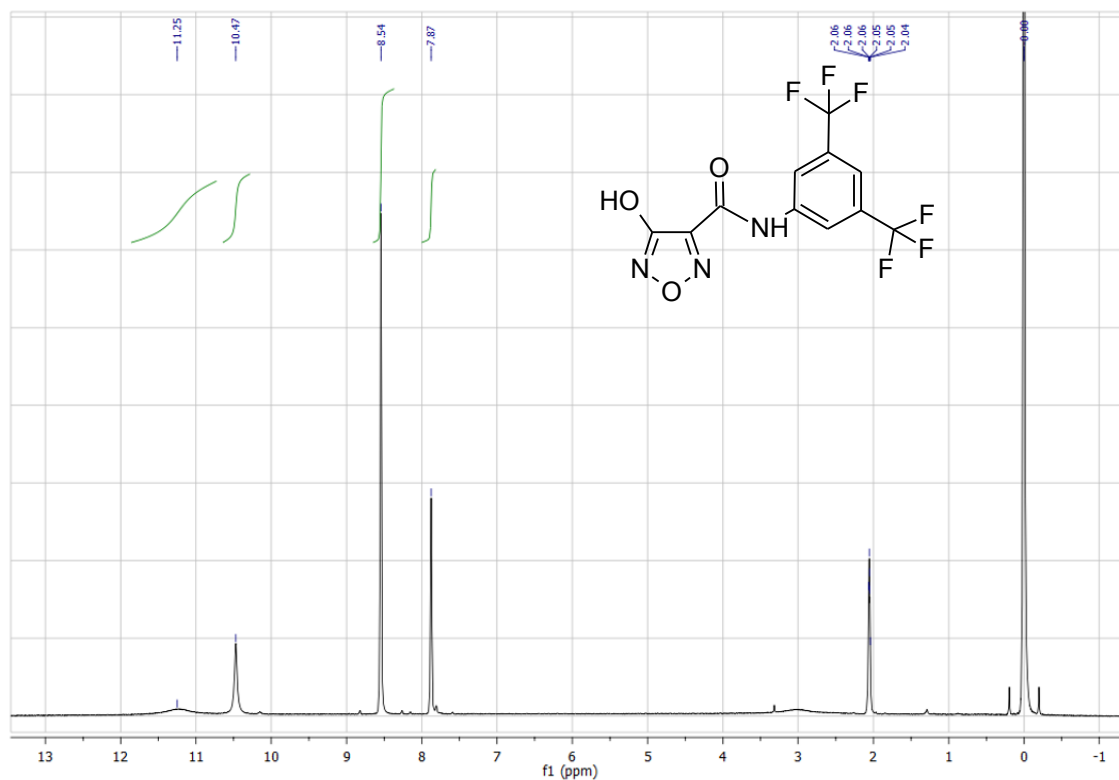

$^1\text{H}$  NMR spectrum ( $\text{CD}_3$ ) $_2\text{CO}$

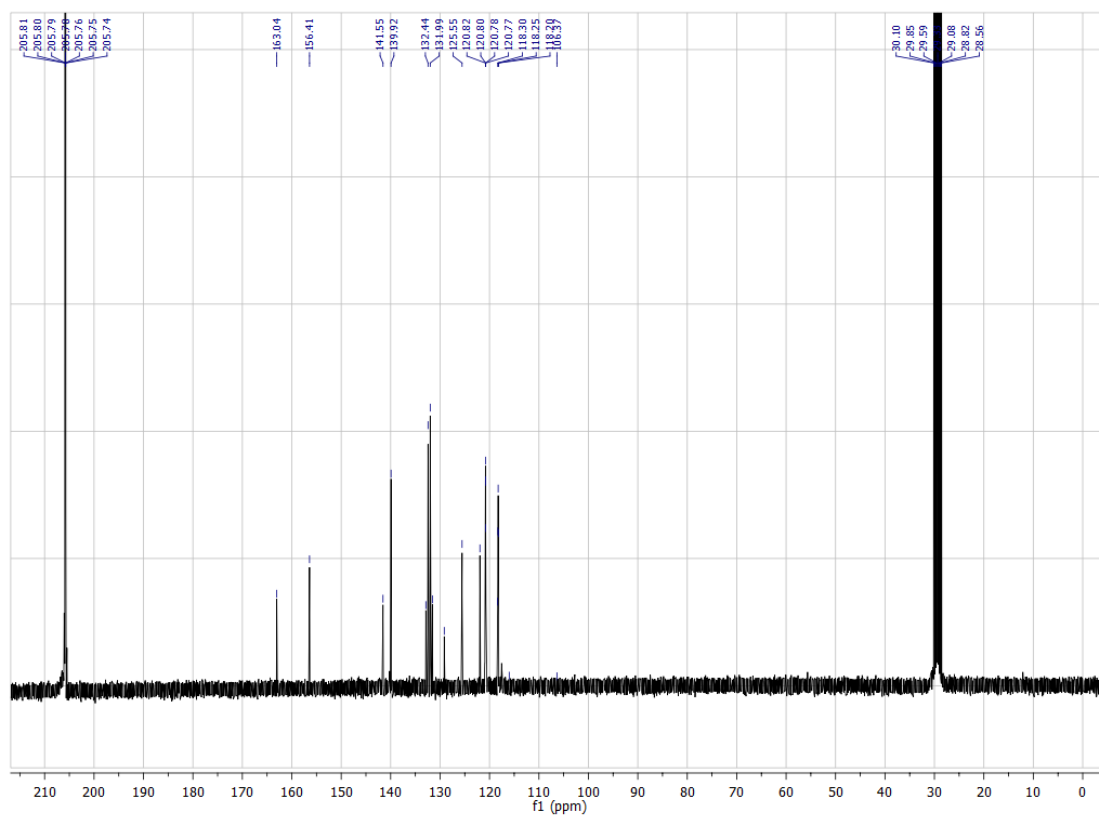

$^{13}\text{C}$  NMR spectrum ( $\text{CD}_3$ ) $_2\text{CO}$

4-Hydroxy-N-[3-(trifluoromethyl)phenyl]-1,2,5-oxadiazole-3-carboxamide (2).

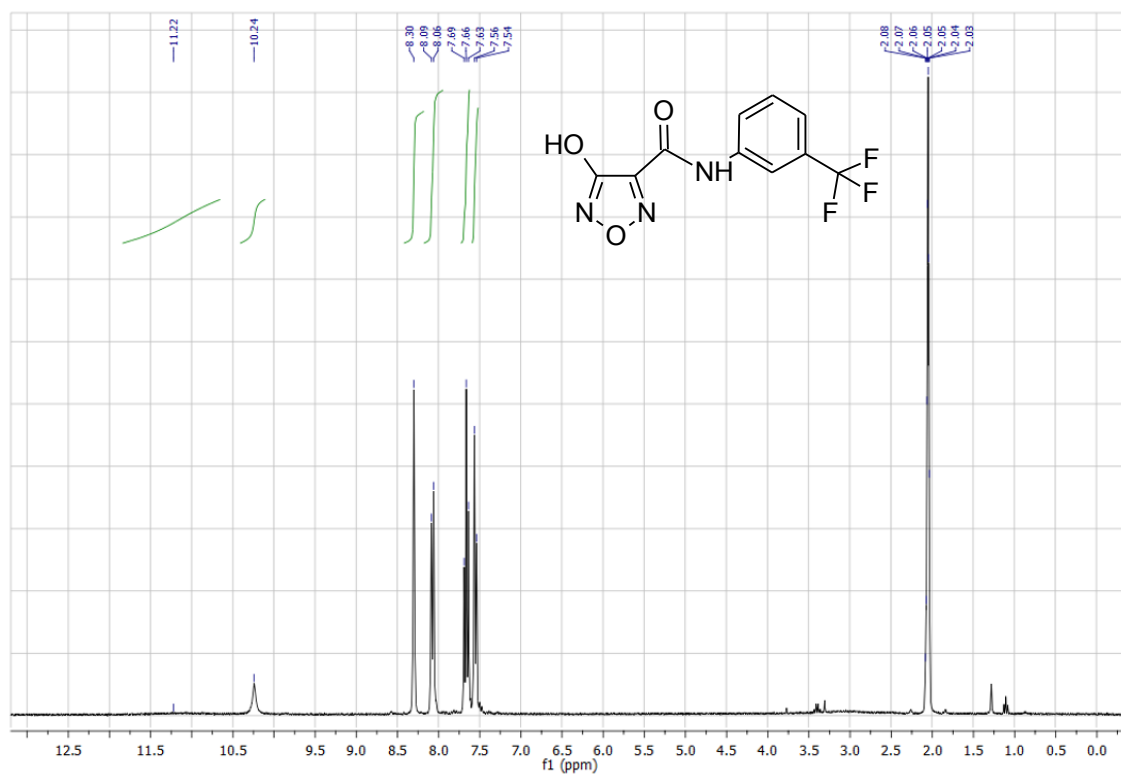

$^1\text{H}$  NMR spectrum ( $\text{CD}_3$ ) $_2\text{CO}$

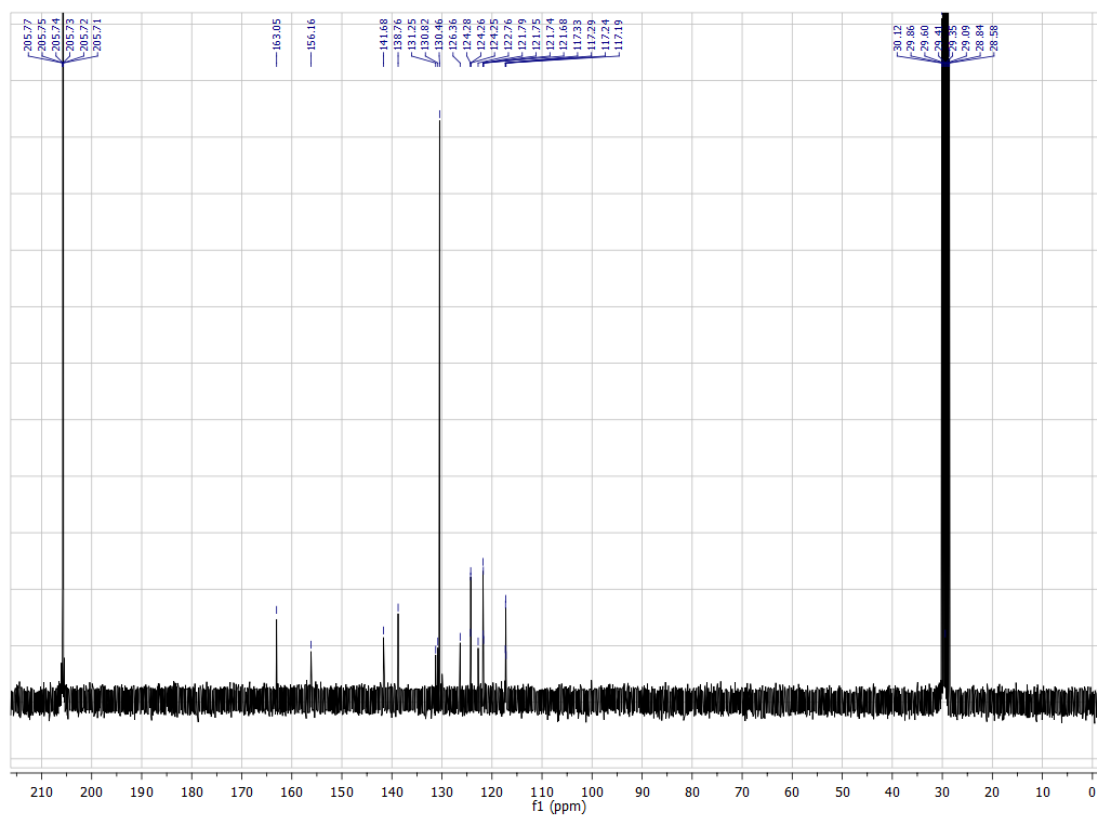

$^{13}\text{C}$  NMR spectrum ( $\text{CD}_3$ ) $_2\text{CO}$

4-Amino-N-[3,5-bis(trifluoromethyl)phenyl]-1,2,5-oxadiazole-3-carboxamide (3).

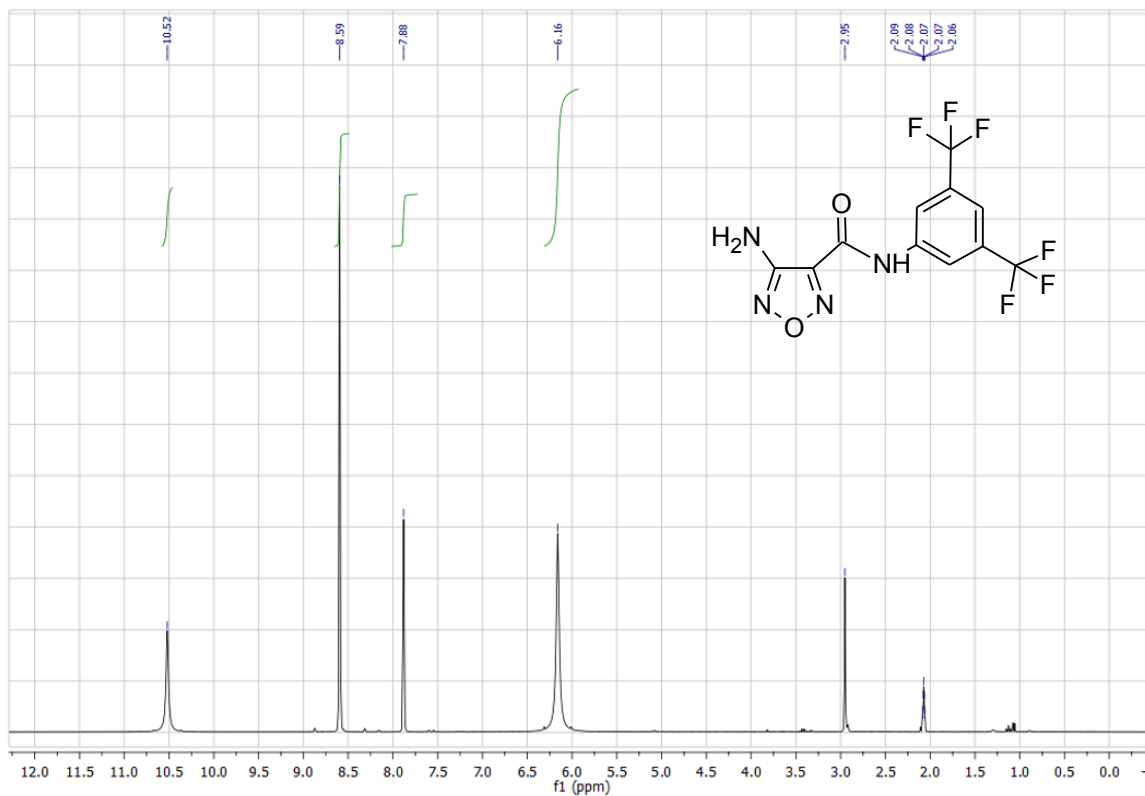

<sup>1</sup>H NMR spectrum (CD<sub>3</sub>)<sub>2</sub>CO

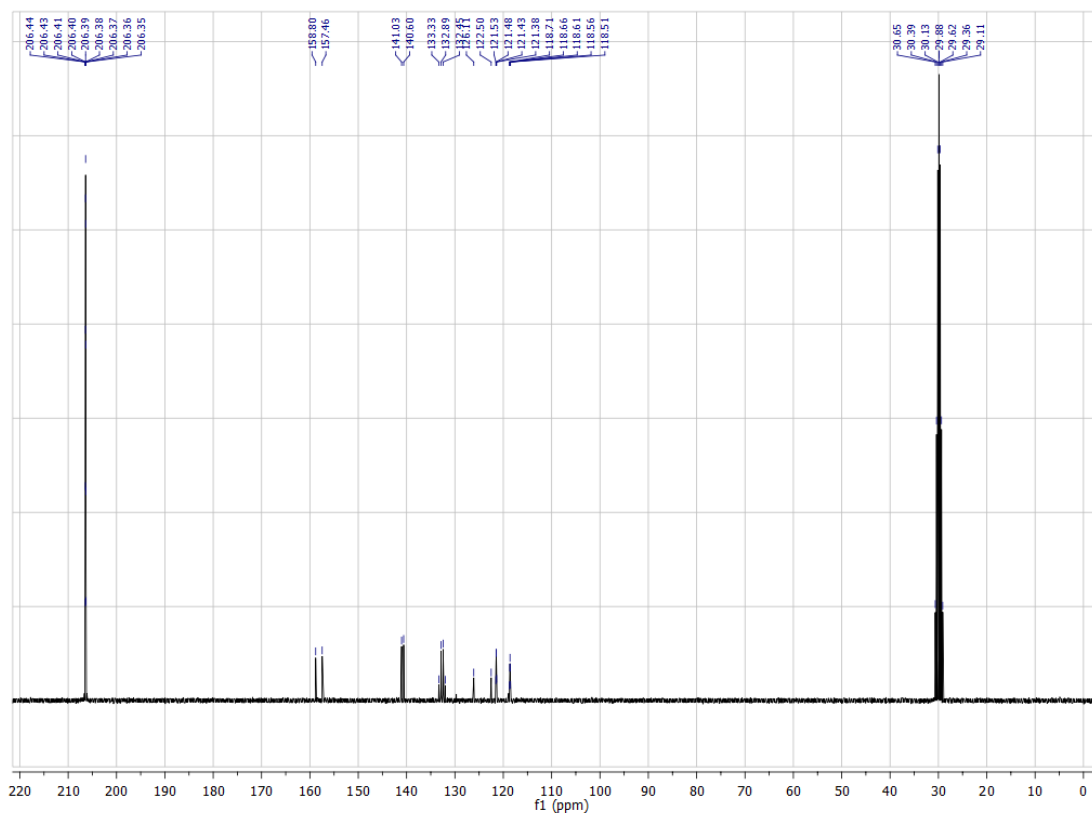

<sup>13</sup>C NMR spectrum (CD<sub>3</sub>)<sub>2</sub>CO



4-Hydroxy-N-[3,5-bis(trifluoromethyl)phenyl]-1,2,5-thiadiazole-3-carboxamide (4).

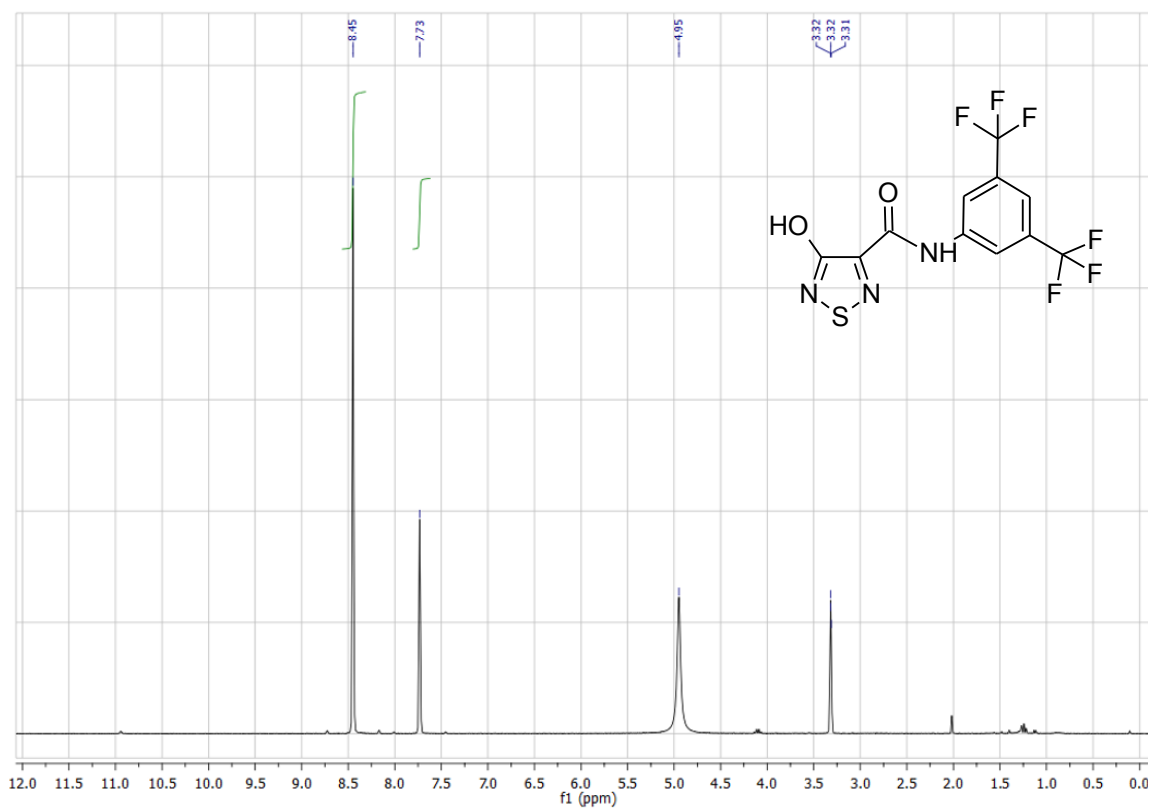

<sup>1</sup>H NMR spectrum CD<sub>3</sub>OD

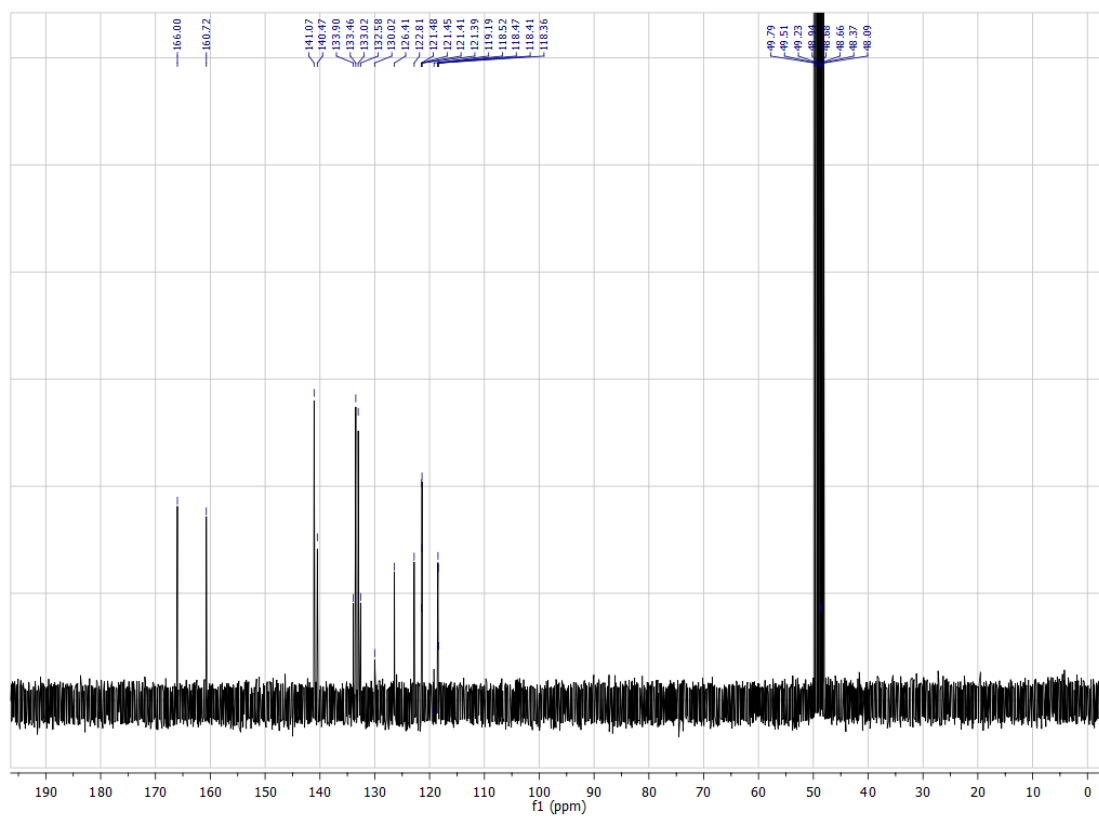

<sup>13</sup>C NMR spectrum CD<sub>3</sub>OD

4-Hydroxy-N-[3-(trifluoromethyl)phenyl]-1,2,5-thiadiazole-3-carboxamide (5).

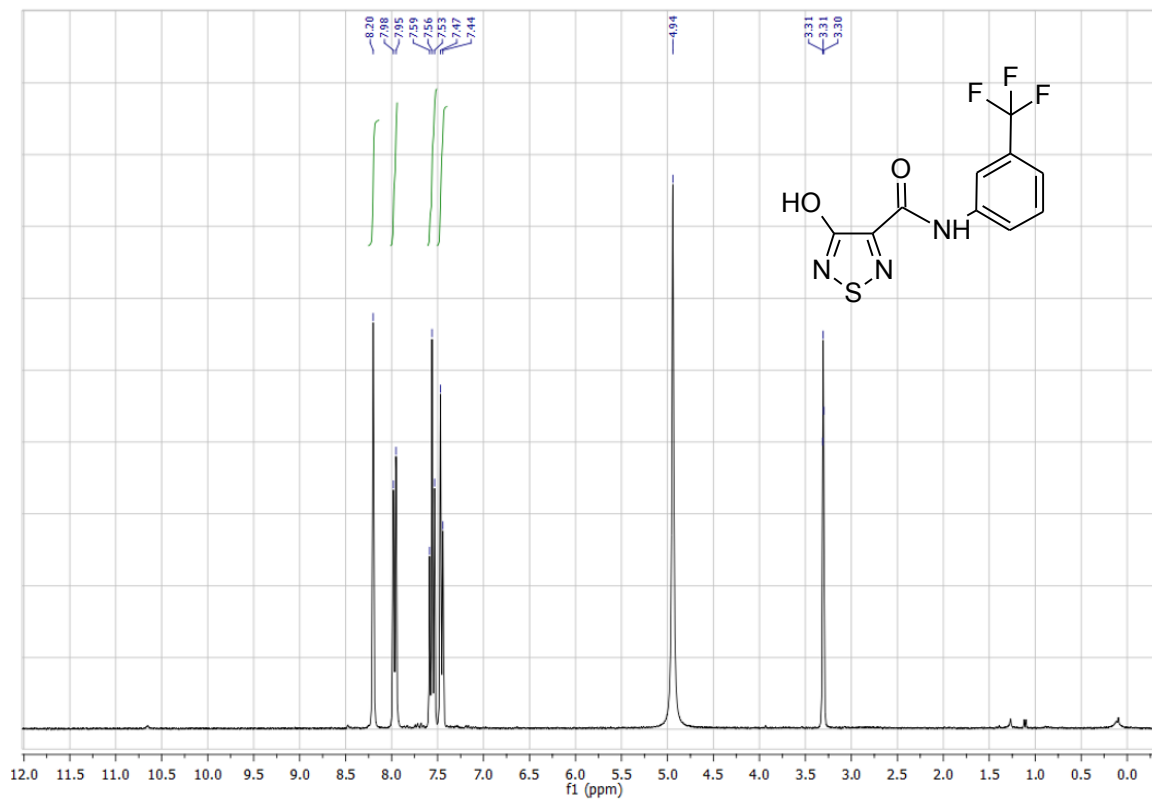

<sup>1</sup>H NMR spectrum CD<sub>3</sub>OD

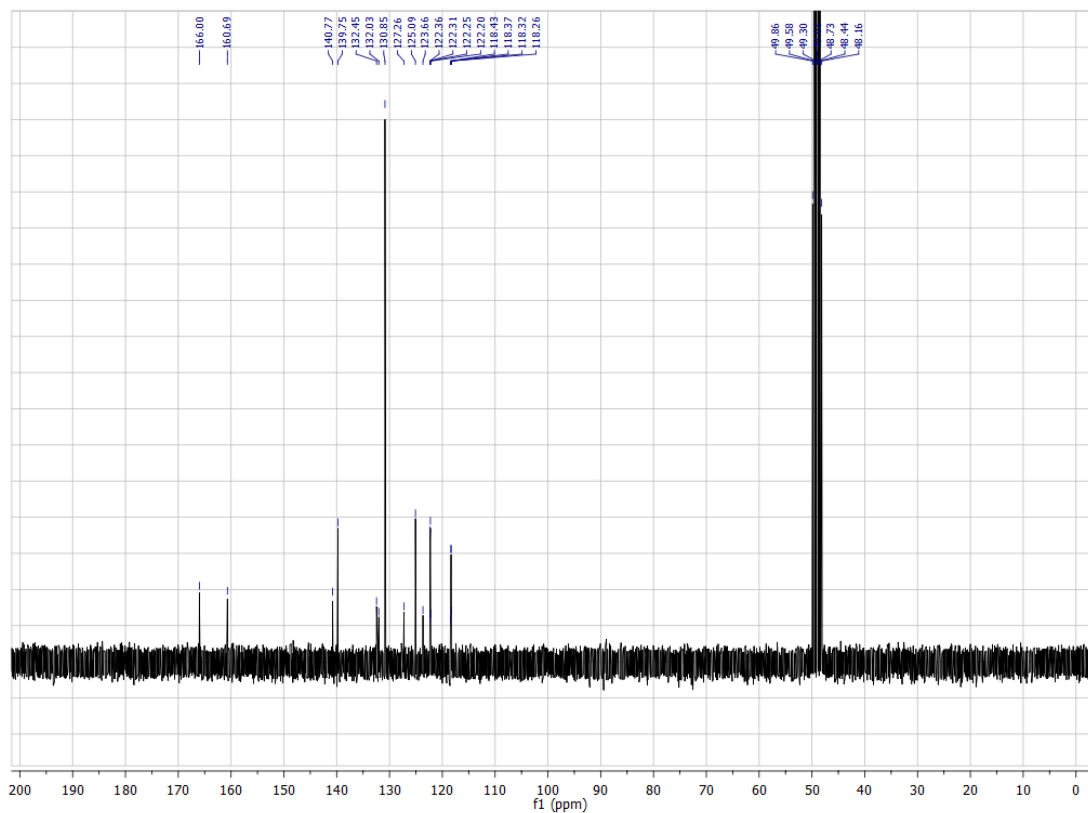

<sup>13</sup>C NMR spectrum CD<sub>3</sub>OD

4-Methoxy-N-[3,5-bis(trifluoromethyl)phenyl]-1,2,5-thiadiazole-3-carboxamide (**6**).

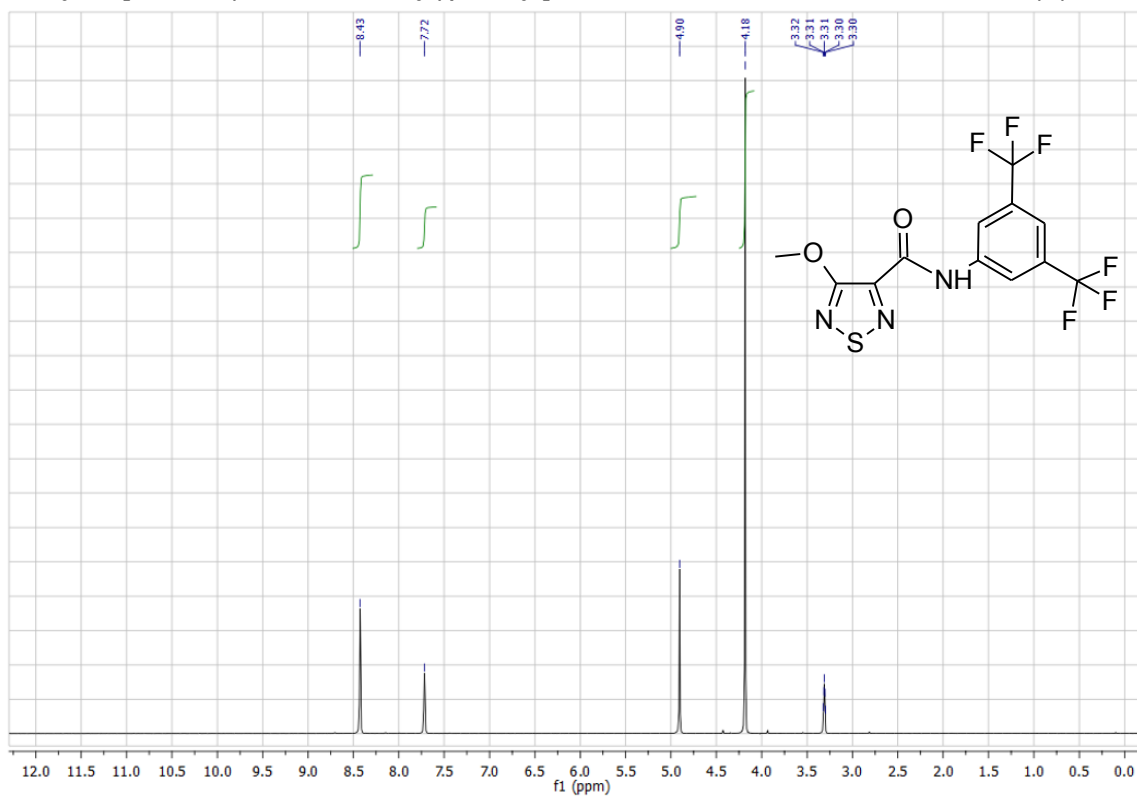

<sup>1</sup>H NMR spectrum CD<sub>3</sub>OD

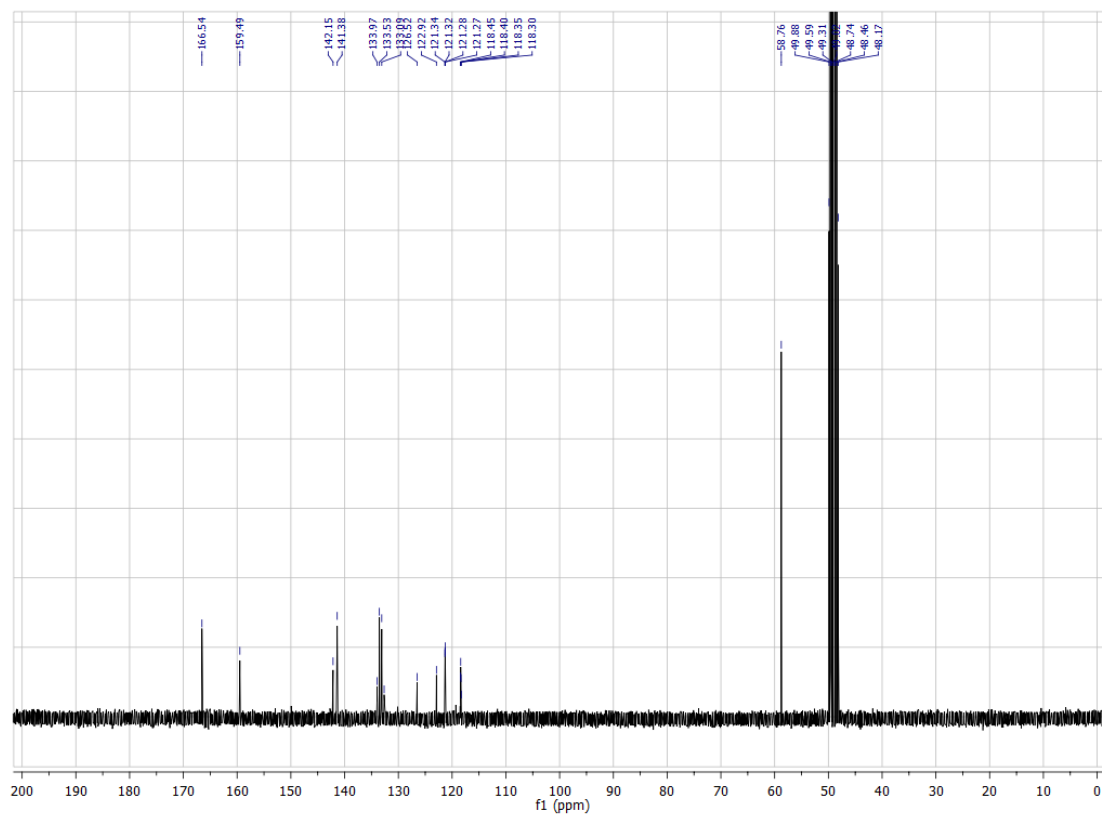

<sup>13</sup>C NMR spectrum CD<sub>3</sub>OD

5-Hydroxy-N-[3,5-bis(trifluoromethyl)phenyl]-2-methyl-2H-1,2,3-triazole-4-carboxamide (7).

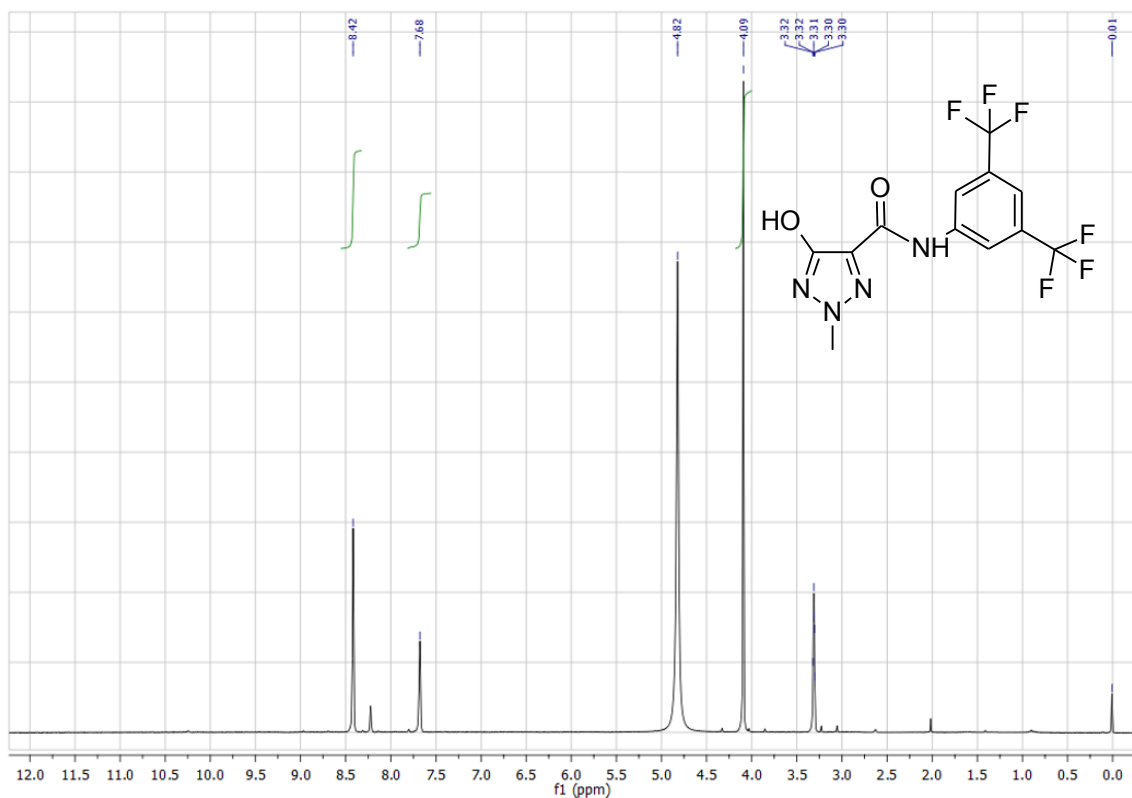

<sup>1</sup>H NMR spectrum CD<sub>3</sub>OD

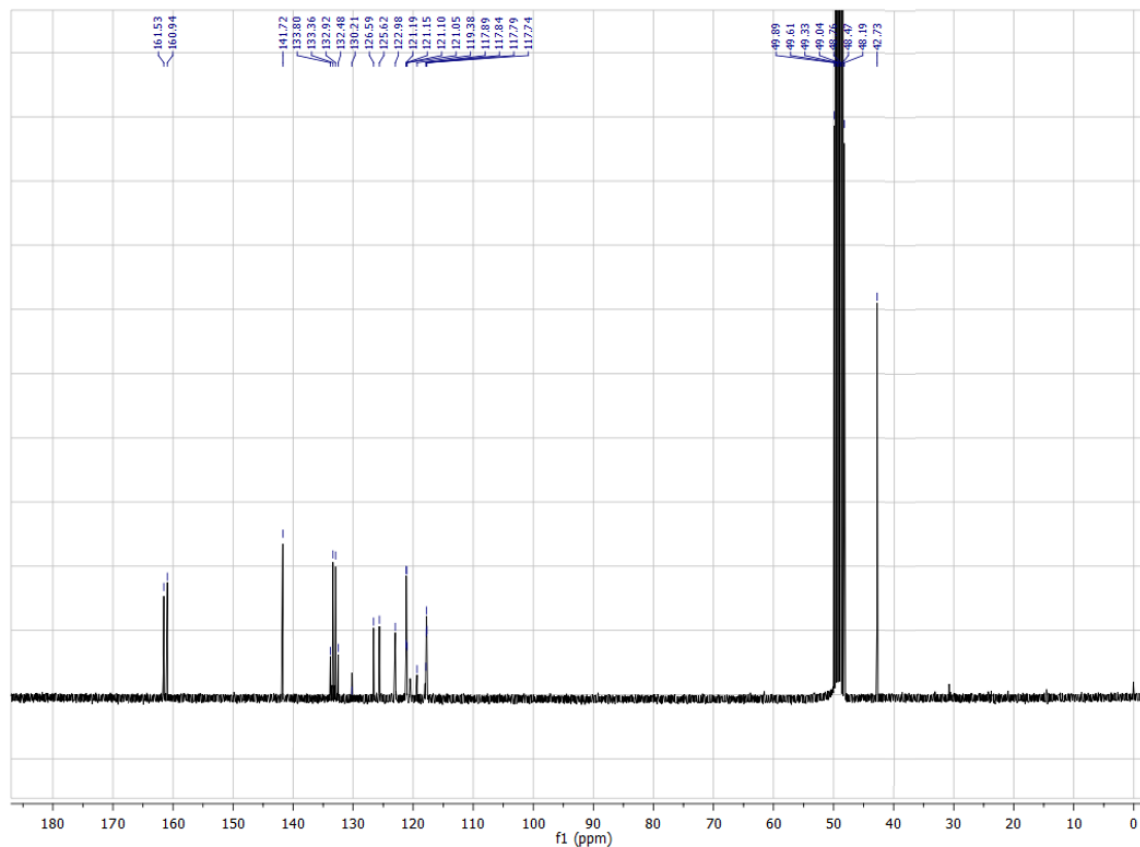

<sup>13</sup>C NMR spectrum CD<sub>3</sub>OD

4-Hydroxy-N-[3,5-bis(trifluoromethyl)phenyl]-1-methyl-1H-1,2,3-triazole-5-carboxamide (**8**).

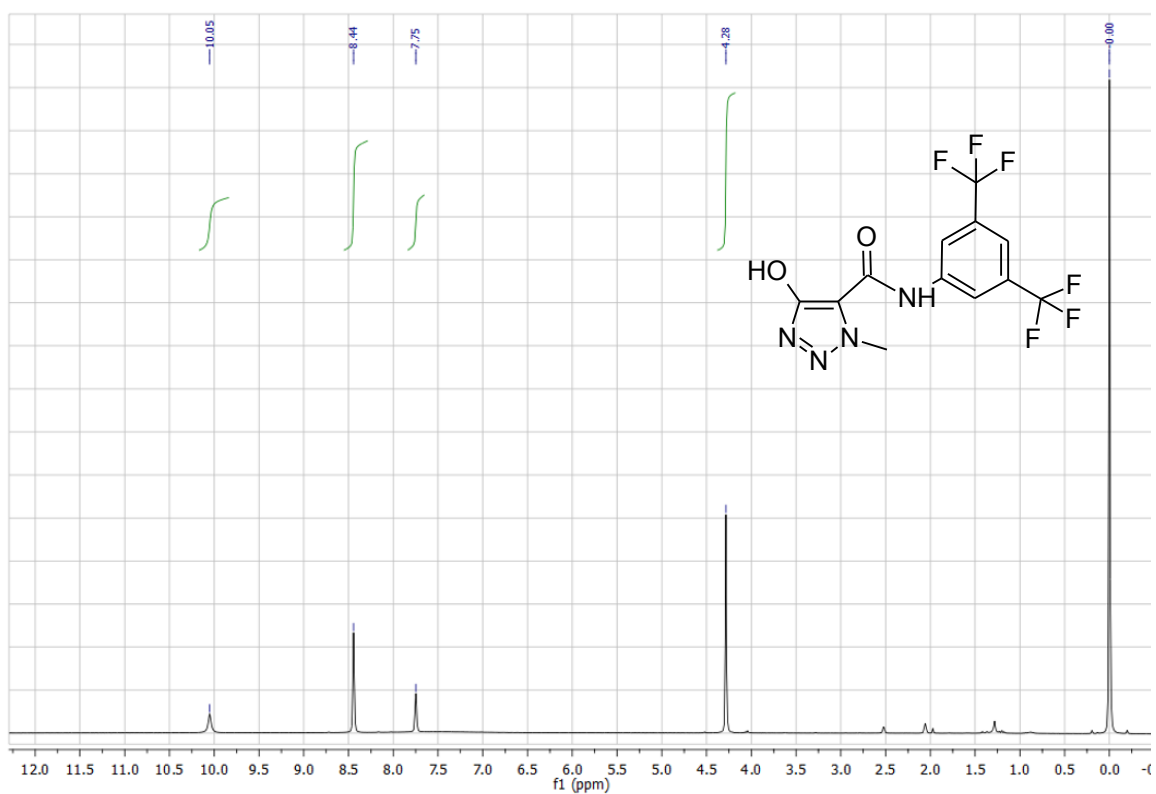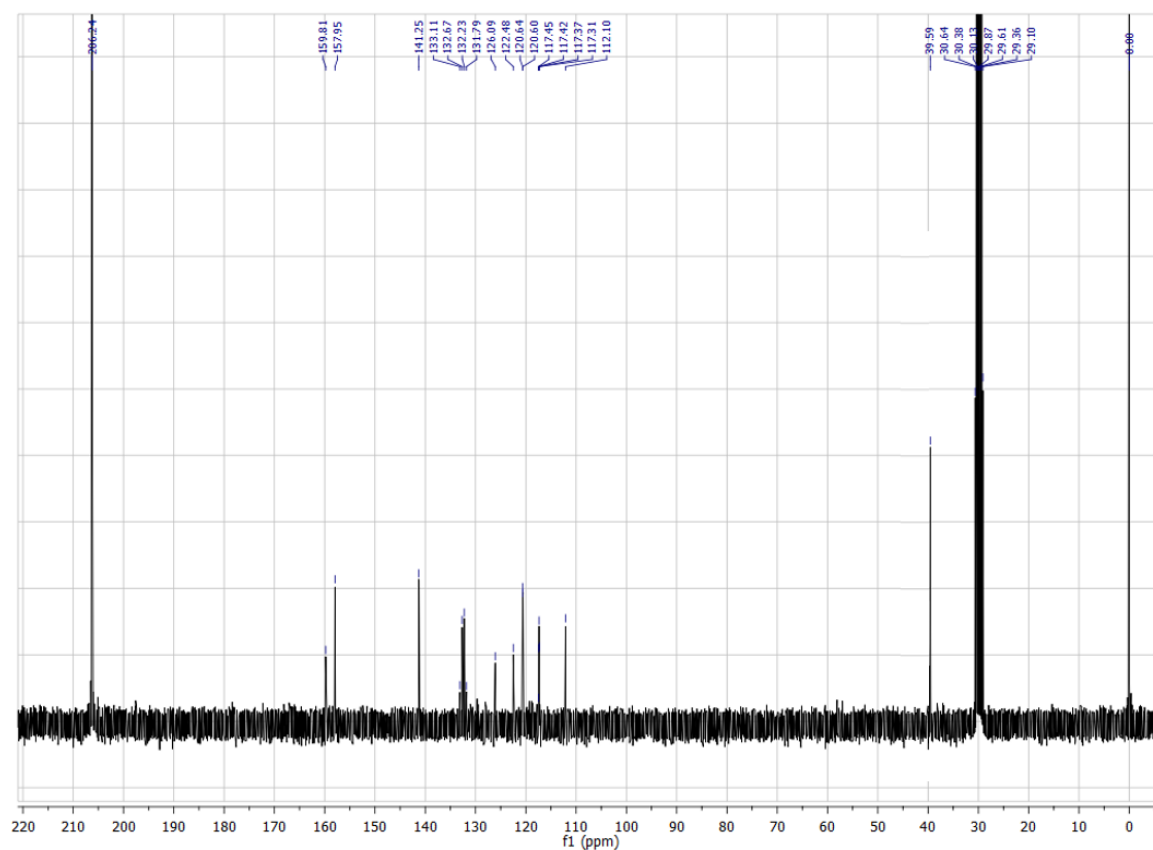

5-Hydroxy-N-[3,5-bis(trifluoromethyl)phenyl]-2H-1,2,3-triazole-4-carboxamide (9).

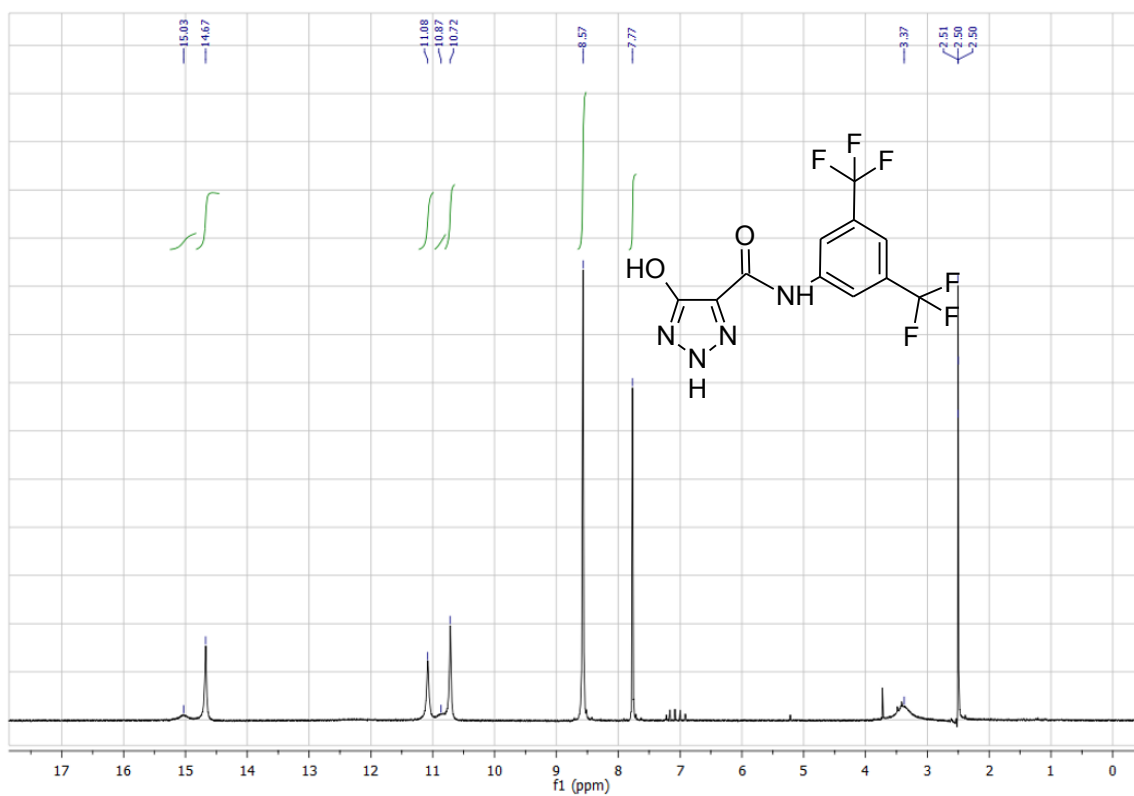

<sup>1</sup>H NMR spectrum (CD<sub>3</sub>)<sub>2</sub>SO

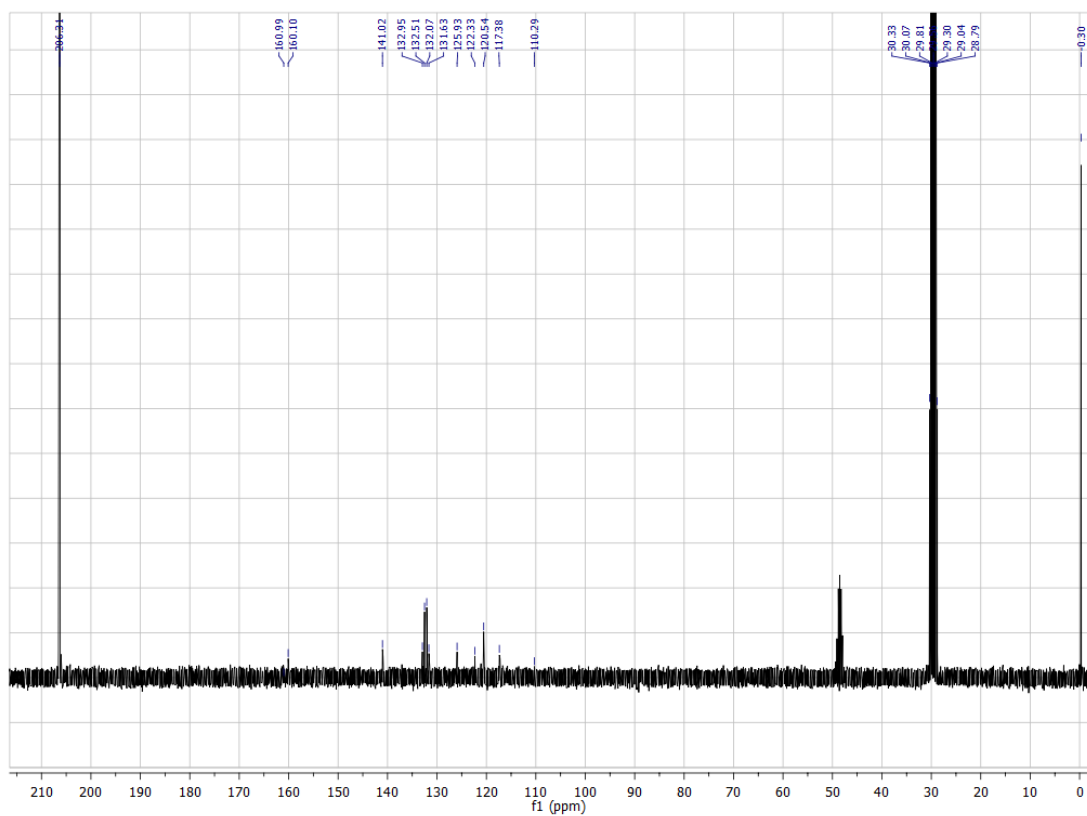

<sup>13</sup>C NMR spectrum (CD<sub>3</sub>)<sub>2</sub>CO

3-Hydroxy-N-[3,5-bis(trifluoromethyl)phenyl]-1-methyl-1H-pyrazole-4-carboxamide (**10**).

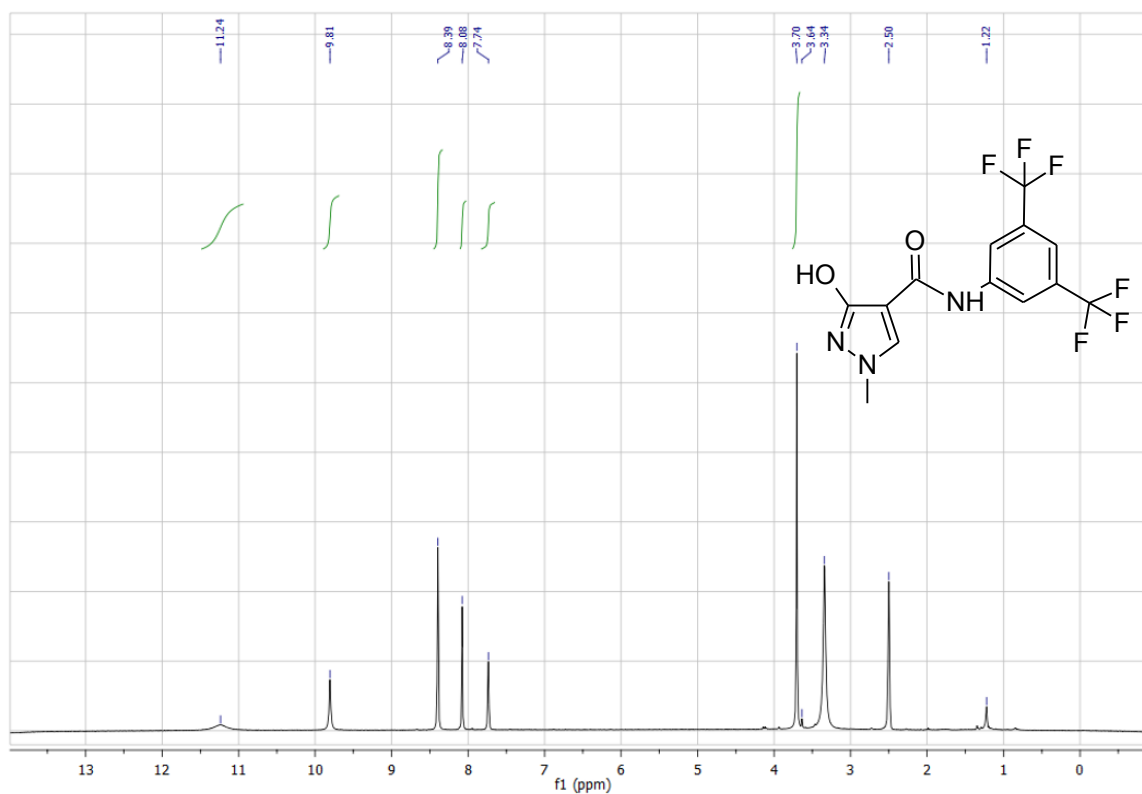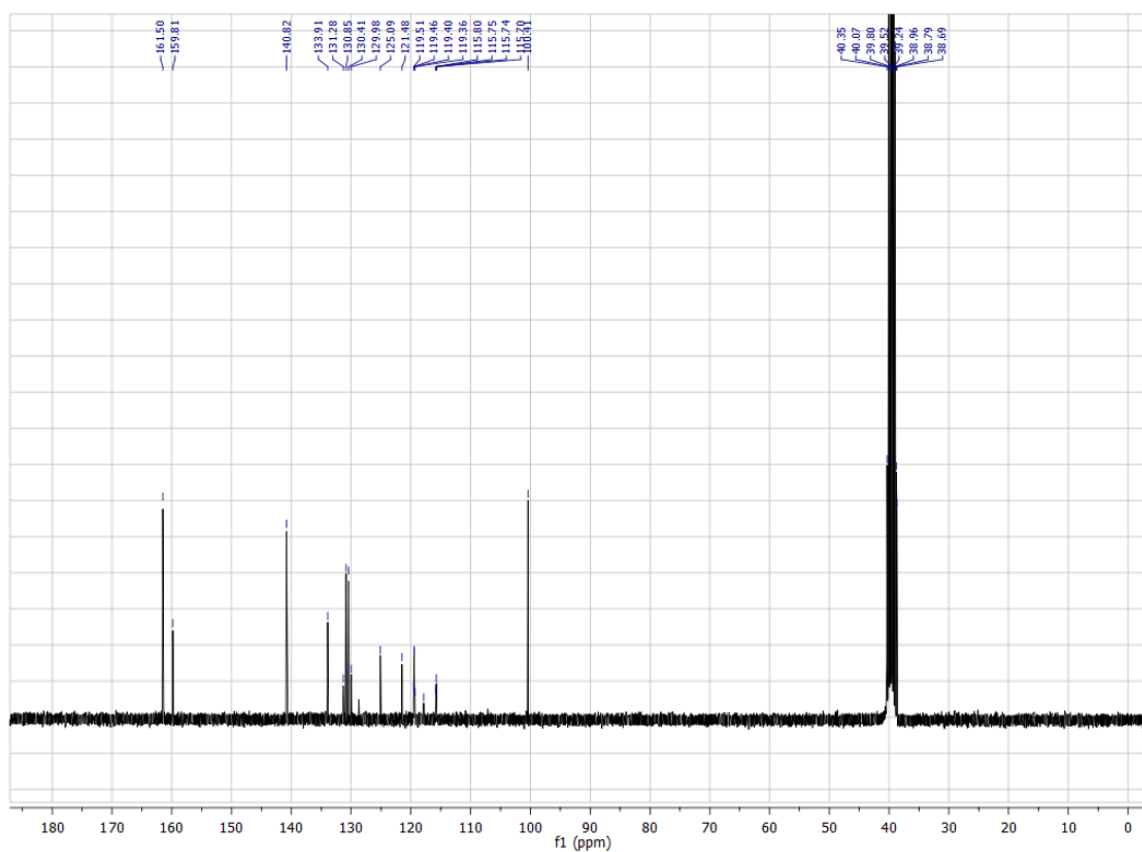

3-Hydroxy-N-[3,5-bis(trifluoromethyl)phenyl]-1,5-dimethyl-1H-pyrazole-4-carboxamide (11).

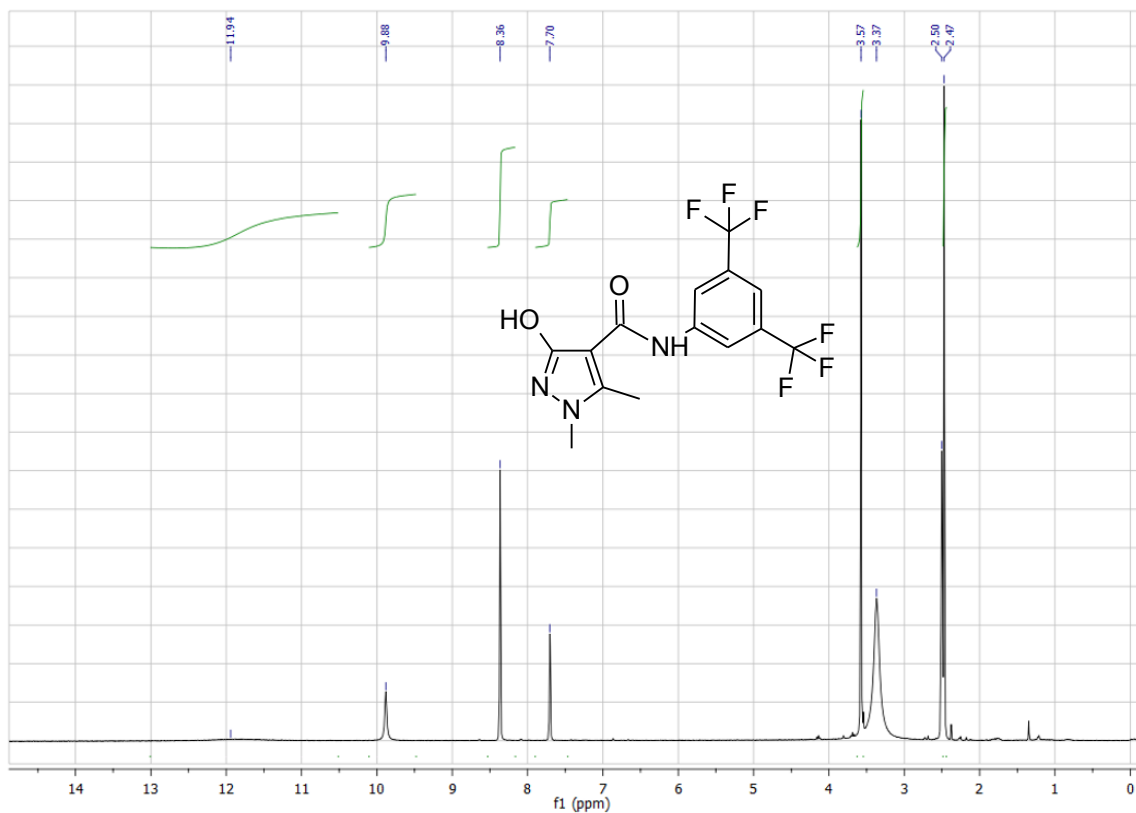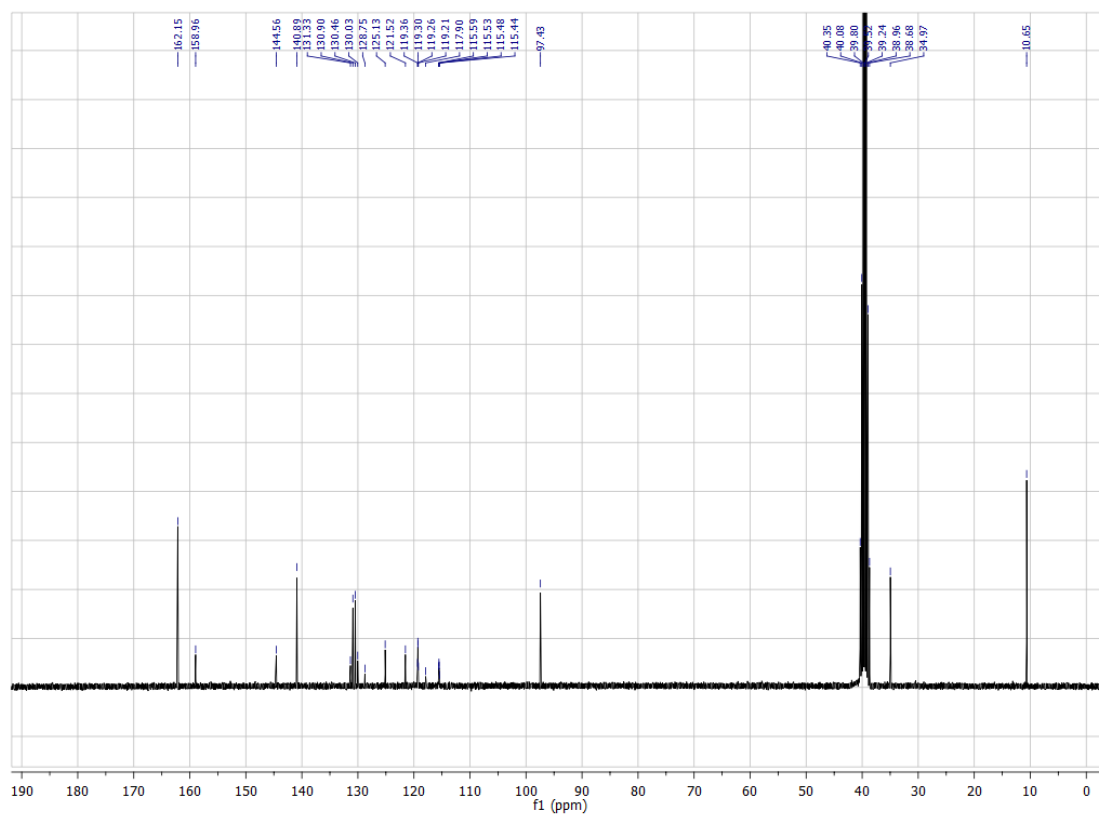



## Biochemical protocols.

**Cell culture and drug treatments.** Jurkat E6.1, THP-1 and MDA-MB-231 cells were cultured in X-VIVO 15 (BE02-060F, Lonza), RPMI-1640 (R8758, Sigma) and DMEM (D-5796, Sigma) media, respectively, supplemented with 10% v/v fetal bovine serum (F-7524, Sigma Aldrich) and 1% v/v antibiotic-antimycotic solution (A-5955, Sigma Aldrich) (complete medium). Cells were maintained at 37 °C in a 5% CO<sub>2</sub> humidified atmosphere. Cells were passaged every 2 – 3 days and discarded after 15 passages. Cells were routinely tested to confirm the absence of Mycoplasma using MycoAlert Plus detection kit (Lonza) and were used between passages 5 and 10 for all experiments. Each compound tested was solubilized in DMSO (drug vehicle, 41639, Fluka) at a final concentration of 10 mM, which was used as the stock solution for all experiments. Final dilutions were made in culture medium.

**Kinase assay.** Reactions were carried out in 96 well microtiter plates in the presence of : 1 μM ATP, enzyme and peptide substrate at optimal concentration (see Table S1), reaction buffer (40 mM Tris-HCl, pH 7.5, 20 mM MgCl<sub>2</sub>, 2 mM MnCl<sub>2</sub>, 2 mM DTT, 100 μM Na<sub>3</sub>VO<sub>4</sub>, 0.1 mg/mL BSA), inhibitory compound or vehicle (DMSO), in a final volume of 25 μL. Temperature 25°C. Incubation length 60 min. Enzyme activity was evaluated using ADP-Glo kinase assay (Promega). Peptide substrates were synthesized by Caslo. Recombinant human IKKβ, IKKε and NIK were provided by ProQinase. Recombinant human IKKα was from Life Technologies.

|            | Peptide sequence   | Substrate concentration | Enzyme concentration |
|------------|--------------------|-------------------------|----------------------|
| IKKα assay | ERLLDDRHSGLDSMKDEE | 100 μM                  | 8 ng/μL              |
| IKKβ assay | ERLLDDRHSGLDSMKDEE | 200 μM                  | 3.2 ng/μL            |
| IKKε assay | ERLLDDRHSGLDSMKDEE | 200 μM                  | 4 ng/μL              |
| NIK assay  | AKDVDQGSLSFVGTLY   | 200 μM                  | 5.2 ng/μL            |

**Table S1.** Sequence of peptide substrate used for each kinase assay. Final concentration of peptide substrate and enzyme in each kinase reaction.

**IκBα degradation assay.** Jurkat cells were exposed for 60 min to the designed compounds, IMD-0354 or PS-1145 at increasing concentrations (0.025 to 20 μM) and then treated for 20 minutes with TNFα (15ng/mL). THP-1 cells were exposed for 60 min to Cpd 4, IMD-0354, PS-1145, aspirin, indomethacin at the indicated concentrations and then treated for 30 minutes with LPS (1μg/mL). At the end of incubation, cells were collected using a cell scraper, washed with phosphate buffer saline (PBS: 137 mM NaCl, 2.7 mM KCl, 8.1 mM Na<sub>2</sub>HPO<sub>4</sub>, 1.76 mM KH<sub>2</sub>PO<sub>4</sub>, pH 7.4), counted manually, lysed with cell extraction buffer (FNN0011, Life Technologies: 30 μL/1 × 10<sup>6</sup> cells) supplemented with 1% v/v protease inhibitor mixture (P8340, Sigma, Milan, Italy) and 4% v/v phosphatase inhibitor mixture (P-0044, Sigma, Milan, Italy) and centrifuged at 15000 × g for 20 min at 4 °C. Proteins were quantified using Protein Assay Kit II (500-0002, Bio-Rad). Proteins (20 μg/lane) were resolved by SDS-polyacrylamide gel electrophoresis (PAGE) on 12% gels and electro-transferred (16 v, 12 h) at 4 °C to polyvinylidene fluoride membranes (PVDF) (IPVH00010, Millipore) equilibrated in Towbin buffer. Membranes were blocked in 5% w/v BSA (sc-2323, Santa Cruz Biotechnology) in 20 mM Tris pH 7.6, 140 mM NaCl, 0.02% v/v Tween-20 (blocking buffer) and probed with the indicated primary antibodies diluted in blocking buffer. Monoclonal antibodies to IκBα (ALX-804-209, Alexis Biochemicals) and β-actin (A-

5441, Sigma) were used at dilution of 1:1000 and 1:20,000, respectively. After washing, membranes were incubated with HRP-conjugated secondary antibody goat anti-mouse IgG (81-6520, Life Technologies) diluted in blocking buffer. Immunoreactive bands were revealed by enhanced chemiluminescence (ECL) (Millipore) and visualized using G:Box Chemi-Xt CCD gel-imaging system and GeneSnap image acquisition software (SynGene, Cambridge, UK). Immunoreactive bands were quantitated using GeneTool software (SynGene, Cambridge, UK). Normalized signals expressed as percentage of control (I $\kappa$ B $\alpha$  band intensity from cells not exposed to TNF $\alpha$ ) were analyzed by non-linear regression to calculate the apparent IC<sub>50</sub> using GraphPad Prism. Values are means  $\pm$  SD of three independent experiments.

*NF- $\kappa$ B gene reporter assay.* Effects of IMD-0354, PS-1145 and compound **4** on NF- $\kappa$ B gene reporter assay in Jurkat and MDA-MB-231 cells. Cells were co-transfected with 3  $\mu$ g of plasmids pGL4.32[*Luc2P/NF- $\kappa$ B-RE/Hygro*] and pGL4.74[*hRLuc/TK*] in the ratio 10:1 using Amaxa nucleofector II and cultured for 24 h at 37 °C in humidified CO<sub>2</sub> incubator. IMD-0354 PS-1145 or compound **4** were added at the indicated concentrations and cells incubated for a further 6 h for Jurkat cells and for further 6 h and 24 h for MDA-MB-231 cells. In Jurkat cells NF- $\kappa$ B pathway was activated through the treatment with TNF $\alpha$  in the last 20 min whilst in MDA-MB-231 cells the NF- $\kappa$ B signalling pathway is reported to be constitutively activated and driven by both IKK $\beta$  and IKK $\alpha$ . At the end of incubation the activities of firefly (*Photinus pyralis*) and Renilla (*Renilla reniformis*) luciferases were measured sequentially from a single sample. Luminescence of Photinus was measured and normalized to the luminescence of Renilla. Normalized signals were expressed as percentage of control (cells exposed to DMSO for MDA-MB-231 assay and DMSO+TNF $\alpha$  for Jurkat assay). Values are means  $\pm$  SD of three independent experiments.

*Cell proliferation.* Growth of MDA-MB-231 cells was evaluated by quantitation of DNA content using the fluorescent dye Hoechst 33258. Cells ( $5 \times 10^3$  in 100  $\mu$ L medium) were seeded in a white 96-well plate and exposed to increasing concentrations (0.001 - 200  $\mu$ M) of each compound or vehicle (DMSO) for 72 h. At the end of incubation, medium was aspirated and wells washed twice with 100  $\mu$ L PBS. Cells were exposed to 100  $\mu$ L 0.02 % SDS solution in SSC buffer (154 mM NaCl, 15 mM sodium citrate, pH 7) for 1 h at 37 °C with occasional swirling. At the end, an equal volume of 1  $\mu$ g/mL Hoechst 33258 solution in SSC buffer was added to each well and fluorescence measured at 355 nm (excitation) and 460 nm (emission) using a Fluoroskan Ascent-Thermo microplate fluorometer (Thermo Fisher Scientific, MA). IC<sub>50</sub> values were determined using nonlinear regression plots with GraphPad Prism6. Values are means  $\pm$  SD of three independent experiments.

*Cytotoxicity assay.* The cytotoxic effects of compounds on MDA-MB-231 cells were evaluated using CellTox green assay (Promega), a fluorimetric assay that measures changes in membrane integrity as a result of cell death. Cells ( $5 \times 10^3$  / well) were seeded in a white - opaque 96-well plate and exposed to increasing concentrations (0.001 - 100  $\mu$ M) of each compound or vehicle (DMSO) for 72 h. IC<sub>50</sub> values were determined using nonlinear regression plots with GraphPad Prism6. Values are means  $\pm$  SD of three independent experiments.
